# Supplementary material
Source: Springer Nature journal article supplement (https://www.springermedizin.de/resource/supplementary/12943_2014_1323_MOESM8_ESM.pdf/9552722)

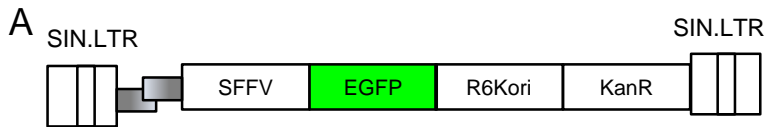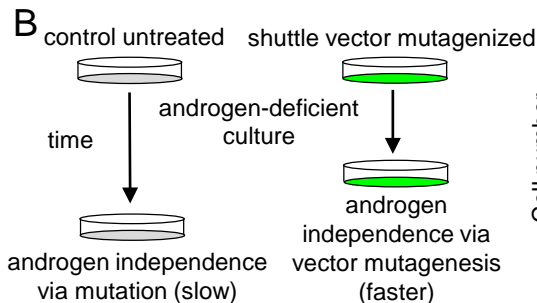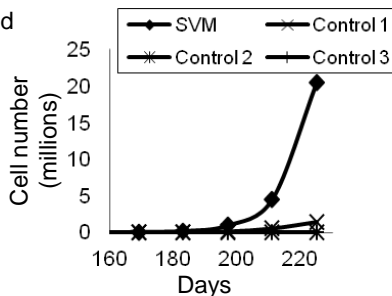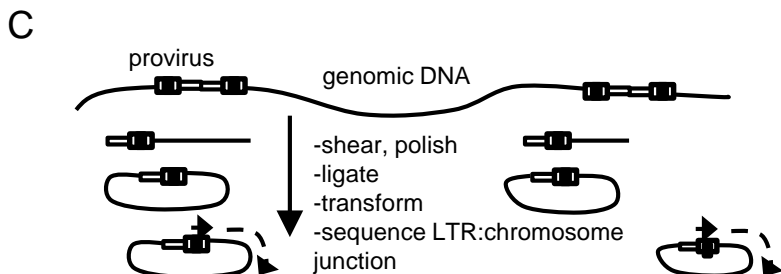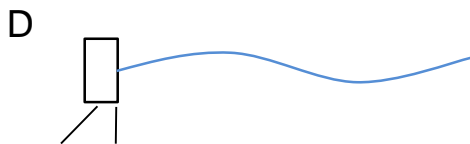

AGCA**GATTCCCCTTGTGAGCCTCCATGTCTGAA...**

LTR **genomic DNA query used to align to human genome**

Supplement: MOESM8 [file 9552722]
